# Supplementary material for: Bioinformatics core competencies for undergraduate life sciences education
Source: PLOS journal article supplement (doi:10.1371/journal.pone.0196878), 2018-06-05
Supplement: S1 (10.1371/journal.pone.0196878.s001) [file journal.pone.0196878.s001]

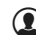

## Integrating Bioinformatics into Life Sciences Education

▼ Default Question Block

Block Options ▼

Q46

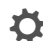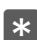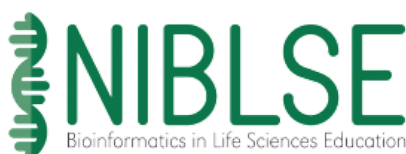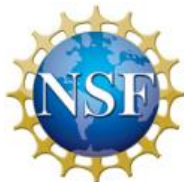

Dear Life Sciences Educator,

The Network for Integrating Bioinformatics into Life Sciences Education (NIBLSE; "nibbles") is a National Science Foundation Research Coordination Network for Undergraduate Biology Education (RCN-UBE) devoted to establishing bioinformatics as essential to the undergraduate life sciences curriculum. To that end, we are asking the community to help us determine core bioinformatics competencies for the undergraduate curriculum.

We are asking you to complete a short, anonymous survey if you are in one or more of the following groups:

- Educators who teach undergraduate life sciences at a 2-year or 4-year college, university, or technical school.
- Educators who supervise graduate students and who expect, or would like to expect, graduate student familiarity with bioinformatics.
- Biologists and/or bioinformaticians who teach/provide training in bioinformatics as part of their work at a company or organization, but not as part of a for-credit course at a college or university.

The survey should take you approximately 15 minutes to complete.

We invite you to read more about our activities and other ways to contribute and provide feedback at our [project website](#) or contact us at the address below. Thank you in advance for your input.

NIBLSE Leadership Team:

Mark Pauley (mark@niblse.org), University of Nebraska at Omaha

Elizabeth Dinsdale, San Diego State University

William Morgan, College of Wooster

Anne Rosenwald, Georgetown University

Eric Triplett, University of Florida

This survey is covered by IRB 161-16-EX. The survey administrator will disassociate any linked or uploaded files from your survey response before sharing these with the research team. For questions about the survey, please contact [Mindy McWilliams](#). NIBLSE is supported by [NSF Award #1539900](#).

NIBLSE is a proud partner of QUBES: <https://qubeshub.org/>

☐ I agree to participate.

☐ I do not agree to participate.

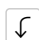

Condition: I do not agree to participate. Is Selected. Skip To: End of Survey.

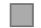

Q51

To begin the survey, please select the statement that best describes your view of bioinformatics in undergraduate life sciences education.

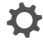

☐ I think bioinformatics should be integrated into undergraduate life sciences education.

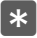

☐ I do not think bioinformatics should be integrated into undergraduate life sciences education.

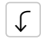

Condition: I do not think bioinformati... Is Selected. Skip To: ABOUT YOU.

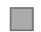

Q57

Please select the statement below that best describes you.

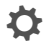

☐ I teach at a 4-year college or university.

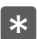

☐ I teach at a 2-year college or technical school.

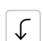

☐ I teach/provide training in bioinformatics as a regular part of my work at a company or organization, but not as part of a for-credit course at a college or university.

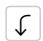

Condition: I teach/provide training in... Is Selected. Skip To: ABOUT YOUR TRAINING.

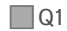

Q1

Please select the statement below that best describes your current teaching of bioinformatics content at your institution.



☐ I teach dedicated bioinformatics course(s) to undergraduates majoring in life sciences or closely related disciplines.

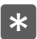

☐ I teach undergraduates majoring in life sciences or closely related disciplines and include substantial bioinformatics (more than one lecture/lab section) in my teaching.

☐ I teach undergraduates majoring in life sciences or closely related disciplines and DO NOT currently include substantial bioinformatics (more than one lecture/lab section) in my teaching but will/would like to do so in the future.

☐ I supervise graduate students in the life sciences or closely related disciplines and expect, or would like to expect, graduate student familiarity with bioinformatics.

**Display This Question:**

If Please select the statement below that best describes your current teaching of bioinformatics con... I teach dedicated bioinformatics course(s) to undergraduates majoring in life sciences or closely related disciplines. Is Selected

Or Please select the statement below that best describes your current teaching of bioinformatics con... I teach undergraduates majoring in life sciences or closely related disciplines and include substantial bioinformatics (more than one lecture/lab section) in my teaching. Is Selected

Or Please select the statement below that best describes your current teaching of bioinformatics con... I teach undergraduates majoring in life sciences or closely related disciplines and DO NOT currently include substantial bioinformatics (more than one lecture/lab section) in my teaching but will/would like to do so in the future. Is Selected

Or Please select the statement below that best describes your current teaching of bioinformatics con... I supervise graduate students in the life sciences or closely related disciplines and expect, or would like to expect, graduate student familiarity with bioinformatics. Is Selected

**ABOUT YOUR CURRICULUM**

Q42

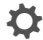

**Display This Question:**

If Please select the statement below that best describes your current teaching of bioinformatics con... I teach dedicated bioinformatics course(s) to undergraduates majoring in life sciences or closely related disciplines. Is Selected

And Please select the statement below that best describes you. I teach at a 4-year college or university. Is Selected

Q2



What is the level of the dedicated bioinformatics course(s) you teach? (Check all that apply.)

- ☐ Freshman
- ☐ Sophomore
- ☐ Junior
- ☐ Senior

**Display This Question:**

If Please select the statement below that best describes your current teaching of bioinformatics con... I teach undergraduates majoring in life sciences or closely related disciplines and include substantial bioinformatics (more than one lecture/lab section) in my teaching. Is Selected

And Please select the statement below that best describes you. I teach at a 4-year college or university. Is Selected

Q36

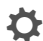

What is the level of the courses with bioinformatics content that you teach? (Check all that apply.)

- ☐ Freshman
- ☐ Sophomore
- ☐ Junior
- ☐ Senior

**Display This Question:**

If Please select the statement below that best describes your current teaching of bioinformatics con... I teach dedicated bioinformatics course(s) to undergraduates majoring in life sciences or closely related disciplines. Is Selected

And Please select the statement below that best describes you. I teach at a 2-year college or technical school. Is Selected

Or Please select the statement below that best describes your current teaching of bioinformatics con... I teach undergraduates majoring in life sciences or closely related disciplines and include substantial bioinformatics (more than one lecture/lab section) in my teaching. Is Selected

And Please select the statement below that best describes you. I teach at a 2-year college or technical school. Is Selected

What is the level of the course(s) you teach? (Check all that apply.)

☐ Freshman

☐ Sophomore

**Display This Question:**

If Please select the statement below that best describes you. I teach at a 2-year college or technical school. Is Selected

And Please select the statement below that best describes your current teaching of bioinformatics con... I teach undergraduates majoring in life sciences or closely related disciplines and DO NOT currently include substantial bioinformatics (more than one lecture/lab section) in my teaching but will/would like to do so in the future. Is Selected

What is the level of the courses you teach in which you would like to include bioinformatics content? (Check all that apply.)

☐ Freshman

☐ Sophomore

**Display This Question:**

If Please select the statement below that best describes your current teaching of bioinformatics con... I teach dedicated bioinformatics course(s) to undergraduates majoring in life sciences or closely related disciplines. Is Selected

Or Please select the statement below that best describes your current teaching of bioinformatics con... I teach undergraduates majoring in life sciences or closely related disciplines and include substantial bioinformatics (more than one lecture/lab section) in my teaching. Is Selected

As part of our work, we are building an online repository of bioinformatics syllabi and content assessments. Would you be willing to share your syllabus/syllabi and/or content assessment(s) with us so they could be added to this repository?

☐ Yes

☐ Maybe

☐ No

**Display This Question:**

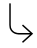

If Please select the statement below that best describes your current teaching of bioinformatics con... I teach undergraduates majoring in life sciences or closely related disciplines and DO NOT currently include substantial bioinformatics (more than one lecture/lab section) in my teaching but will/would like to do so in the future. Is Selected

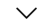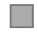

Q37

What is the level of the courses you teach in which you would like to include bioinformatics content? (Check all that apply.)

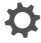

- ☐ Freshman
- ☐ Sophomore
- ☐ Junior
- ☐ Senior

**Display This Question:**

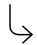

If Please select the statement below that best describes your current teaching of bioinformatics con... I teach undergraduates majoring in life sciences or closely related disciplines and DO NOT currently include substantial bioinformatics (more than one lecture/lab section) in my teaching but will/would like to do so in the future. Is Selected

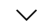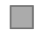

Q38

What is preventing you from including bioinformatics content in these courses?

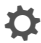

**Display This Question:**

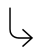

If Please select the statement below that best describes your current teaching of bioinformatics con... I teach undergraduates majoring in life sciences or closely related disciplines and DO NOT currently include substantial bioinformatics (more than one lecture/lab section) in my teaching but will/would like to do so in the future. Is Selected  
Or Please select the statement below that best describes your current teaching of bioinformatics con... I supervise graduate students in the life sciences or closely related disciplines and expect, or would like to expect, graduate student familiarity with bioinformatics. Is Selected

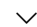

Q40

Are there undergraduate courses with bioinformatics content at your institution that life sciences students routinely take? If "yes," please encourage those teaching these classes to complete the survey (forward the solicitation e-mail).

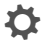

- ☐ Yes
- ☐ No
- ☐ Don't know

**Display This Question:**

If Please select the statement below that best describes your current teaching of bioinformatics con... I teach dedicated bioinformatics course(s) to undergraduates majoring in life sciences or closely related disciplines. Is Selected

Or Please select the statement below that best describes your current teaching of bioinformatics con... I teach undergraduates majoring in life sciences or closely related disciplines and include substantial bioinformatics (more than one lecture/lab section) in my teaching. Is Selected

■ Q4

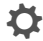

Aside from the course(s) you teach, are there other undergraduate courses with bioinformatics content at your institution that life sciences students routinely take? If "yes," please encourage those teaching these courses to complete this survey (forward the solicitation e-mail).

- ☐ Yes
- ☐ No
- ☐ Don't know

**Display This Question:**

If Please select the statement below that best describes your current teaching of bioinformatics con... I teach dedicated bioinformatics course(s) to undergraduates majoring in life sciences or closely related disciplines. Is Selected

Or Please select the statement below that best describes your current teaching of bioinformatics con... I teach undergraduates majoring in life sciences or closely related disciplines and include substantial bioinformatics (more than one lecture/lab section) in my teaching. Is Selected

Or Please select the statement below that best describes your current teaching of bioinformatics con... I teach undergraduates majoring in life sciences or closely related disciplines and DO NOT currently include substantial bioinformatics (more than one lecture/lab section) in my teaching but will/would like to do so in the future. Is Selected

■ Q5

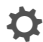

In your opinion, are additional undergraduate courses with bioinformatics content needed at your institution?

- ☐ Yes
- ☐ No
- ☐ Don't know

**Display This Question:**

If In your opinion, are additional undergraduate courses with bioinformatics content needed at your... Yes Is Selected

■ Q6

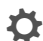

Optional: Please describe briefly; include any barriers to development and/or implementation.

**Display This Question:**

If Please select the statement below that best describes your current teaching of bioinformatics con... I teach dedicated bioinformatics course(s) to undergraduates majoring in life sciences or closely related disciplines. Is Selected

Or Please select the statement below that best describes your current teaching of bioinformatics con... I teach undergraduates majoring in life sciences or closely related disciplines and include substantial bioinformatics (more than one lecture/lab section) in my teaching. Is Selected

Or Please select the statement below that best describes your current teaching of bioinformatics con... I teach undergraduates majoring in life sciences or closely related disciplines and DO NOT currently include substantial bioinformatics (more than one lecture/lab section) in my teaching but will/would like to do so in the future. Is Selected

Or Please select the statement below that best describes your current teaching of bioinformatics con... I supervise graduate students in the life sciences or closely related disciplines and expect, or would like to expect, graduate student familiarity with bioinformatics. Is Selected

Q7

Is an undergraduate bioinformatics certificate or minor offered at your institution?

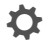

☐ Yes

☐ No

☐ Don't know

**Display This Question:**

If Is an undergraduate bioinformatics certificate or minor offered at your institution? Yes Is Selected

Q8

Optional: Please give certificate or minor name, department/unit in which it's offered, and website URL (if available).



**Display This Question:**

If Please select the statement below that best describes your current teaching of bioinformatics con... I teach dedicated bioinformatics course(s) to undergraduates majoring in life sciences or closely related disciplines. Is Selected

Or Please select the statement below that best describes your current teaching of bioinformatics con... I teach undergraduates majoring in life sciences or closely related disciplines and include substantial bioinformatics (more than one lecture/lab section) in my teaching. Is Selected

Or Please select the statement below that best describes your current teaching of bioinformatics con... I teach undergraduates majoring in life sciences or closely related disciplines and DO NOT currently include substantial bioinformatics (more than one lecture/lab section) in my teaching but will/would like to do so in the future. Is Selected

Or Please select the statement below that best describes your current teaching of bioinformatics con... I supervise graduate students in the life sciences or closely related disciplines and expect, or would like to expect, graduate student familiarity with bioinformatics. Is Selected

Q9

Is an undergraduate bioinformatics major offered at your institution?

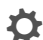

☐ Yes

☐ No

☐ Don't know

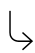**Display This Question:**

If Is an undergraduate bioinformatics major offered at your institution? Yes Is Selected

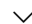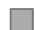

Q10

Optional: Please give name, department/unit in which it's offered, and website URL (if available):

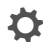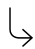**Display This Question:**

If Please select the statement below that best describes you. I teach/provide training in bioinformatics as a regular part of my work at a company or organization, but not as part of a for-credit course at a college or university. Is Selected

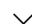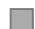

Q53

**ABOUT YOUR TRAINING**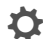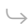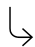**Display This Question:**

If Please select the statement below that best describes you. I teach/provide training in bioinformatics as a regular part of my work at a company or organization, but not as part of a for-credit course at a college or university. Is Selected

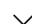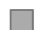

Q54

Briefly describe the format of the bioinformatics training (e.g., boot camp, short course, etc.) you most commonly provide.

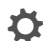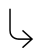**Display This Question:**

If Please select the statement below that best describes you. I teach/provide training in bioinformatics as a regular part of my work at a company or organization, but not as part of a for-credit course at a college or university. Is Selected

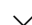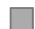

Q55

Briefly describe your audience for this training.

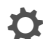



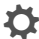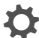

|                                                                                                                    | Not at all important  | Slightly important    | Moderately important  | Very important        | Extremely important   | × No opinion          |
|--------------------------------------------------------------------------------------------------------------------|-----------------------|-----------------------|-----------------------|-----------------------|-----------------------|-----------------------|
| Understand the role of computation and data mining in hypothesis-driven processes within the life sciences?        | <input type="radio"/> | <input type="radio"/> | <input type="radio"/> | <input type="radio"/> | <input type="radio"/> | <input type="radio"/> |
| Understand computational concepts used in bioinformatics, e.g., meaning of algorithm, bioinformatics file formats? | <input type="radio"/> | <input type="radio"/> | <input type="radio"/> | <input type="radio"/> | <input type="radio"/> | <input type="radio"/> |
| Know statistical concepts used in bioinformatics, e.g., E-value, z-scores, t-test?                                 | <input type="radio"/> | <input type="radio"/> | <input type="radio"/> | <input type="radio"/> | <input type="radio"/> | <input type="radio"/> |
| Know how to access genomic data, e.g., in NCBI nucleotide databases?                                               | <input type="radio"/> | <input type="radio"/> | <input type="radio"/> | <input type="radio"/> | <input type="radio"/> | <input type="radio"/> |
| Be able to use bioinformatics tools to                                                                             |                       |                       |                       |                       |                       |                       |

Be able to use bioinformatics tools to analyze genomic data, e.g., BLASTN, genome browser?

|                       |                       |                       |                       |                       |                       |
|-----------------------|-----------------------|-----------------------|-----------------------|-----------------------|-----------------------|
| <input type="radio"/> | <input type="radio"/> | <input type="radio"/> | <input type="radio"/> | <input type="radio"/> | <input type="radio"/> |
| Not at all important  | Slightly important    | Moderately important  | Very important        | Extremely important   | ✗ No opinion          |

Know how to access gene expression data, e.g., in UniGene, GEO, SRA?

|                       |                       |                       |                       |                       |                       |
|-----------------------|-----------------------|-----------------------|-----------------------|-----------------------|-----------------------|
| <input type="radio"/> | <input type="radio"/> | <input type="radio"/> | <input type="radio"/> | <input type="radio"/> | <input type="radio"/> |
|-----------------------|-----------------------|-----------------------|-----------------------|-----------------------|-----------------------|

Be able to use bioinformatics tools to analyze gene expression data, e.g., GeneSifter, David, ORF Finder?

|                       |                       |                       |                       |                       |                       |
|-----------------------|-----------------------|-----------------------|-----------------------|-----------------------|-----------------------|
| <input type="radio"/> | <input type="radio"/> | <input type="radio"/> | <input type="radio"/> | <input type="radio"/> | <input type="radio"/> |
|-----------------------|-----------------------|-----------------------|-----------------------|-----------------------|-----------------------|

Know how to access proteomic data, e.g., in NCBI protein databases?

|                       |                       |                       |                       |                       |                       |
|-----------------------|-----------------------|-----------------------|-----------------------|-----------------------|-----------------------|
| <input type="radio"/> | <input type="radio"/> | <input type="radio"/> | <input type="radio"/> | <input type="radio"/> | <input type="radio"/> |
|-----------------------|-----------------------|-----------------------|-----------------------|-----------------------|-----------------------|

Be able to use bioinformatics tools to examine protein structure and function, e.g., BLASTP, Cn3D, PyMol?

|                       |                       |                       |                       |                       |                       |
|-----------------------|-----------------------|-----------------------|-----------------------|-----------------------|-----------------------|
| <input type="radio"/> | <input type="radio"/> | <input type="radio"/> | <input type="radio"/> | <input type="radio"/> | <input type="radio"/> |
|-----------------------|-----------------------|-----------------------|-----------------------|-----------------------|-----------------------|

Know how to access metabolomic and systems biology data, e.g., in the Human Metabolome Database?

|                       |                       |                       |                       |                       |                       |
|-----------------------|-----------------------|-----------------------|-----------------------|-----------------------|-----------------------|
| <input type="radio"/> | <input type="radio"/> | <input type="radio"/> | <input type="radio"/> | <input type="radio"/> | <input type="radio"/> |
|-----------------------|-----------------------|-----------------------|-----------------------|-----------------------|-----------------------|

|                      |                    |                      |                |                     |              |
|----------------------|--------------------|----------------------|----------------|---------------------|--------------|
| Not at all important | Slightly important | Moderately important | Very important | Extremely important | ✗ No opinion |
|----------------------|--------------------|----------------------|----------------|---------------------|--------------|

Be able to use bioinformatics tools to examine the flow of molecules within pathways/networks, e.g., Gene Ontology, KEGG?

|                       |                       |                       |                       |                       |                       |
|-----------------------|-----------------------|-----------------------|-----------------------|-----------------------|-----------------------|
| <input type="radio"/> | <input type="radio"/> | <input type="radio"/> | <input type="radio"/> | <input type="radio"/> | <input type="radio"/> |
|-----------------------|-----------------------|-----------------------|-----------------------|-----------------------|-----------------------|

Be able to use bioinformatics tools to examine metagenomics data, e.g., MEGA, MUSCLE?

|                       |                       |                       |                       |                       |                       |
|-----------------------|-----------------------|-----------------------|-----------------------|-----------------------|-----------------------|
| <input type="radio"/> | <input type="radio"/> | <input type="radio"/> | <input type="radio"/> | <input type="radio"/> | <input type="radio"/> |
| Not at all important  | Slightly important    | Moderately important  | Very important        | Extremely important   | ✗ No opinion          |

Know how to write short computer programs as part of the scientific discovery process, e.g., write a script to analyze sequence data?

|                       |                       |                       |                       |                       |                       |
|-----------------------|-----------------------|-----------------------|-----------------------|-----------------------|-----------------------|
| <input type="radio"/> | <input type="radio"/> | <input type="radio"/> | <input type="radio"/> | <input type="radio"/> | <input type="radio"/> |
|-----------------------|-----------------------|-----------------------|-----------------------|-----------------------|-----------------------|

Be able to use software packages to manipulate and analyze bioinformatics data, e.g., Geneious, Vector NTI Express, spreadsheets?

|                       |                       |                       |                       |                       |                       |
|-----------------------|-----------------------|-----------------------|-----------------------|-----------------------|-----------------------|
| <input type="radio"/> | <input type="radio"/> | <input type="radio"/> | <input type="radio"/> | <input type="radio"/> | <input type="radio"/> |
|-----------------------|-----------------------|-----------------------|-----------------------|-----------------------|-----------------------|

Operate in a variety of computational environments to manipulate and analyze bioinformatics data, e.g., Mac OS, Windows, web- or cloud-based, Unix/Linux command line?

|                       |                       |                       |                       |                       |                       |
|-----------------------|-----------------------|-----------------------|-----------------------|-----------------------|-----------------------|
| <input type="radio"/> | <input type="radio"/> | <input type="radio"/> | <input type="radio"/> | <input type="radio"/> | <input type="radio"/> |
|-----------------------|-----------------------|-----------------------|-----------------------|-----------------------|-----------------------|

|                      |                    |                      |                |                     |              |
|----------------------|--------------------|----------------------|----------------|---------------------|--------------|
| Not at all important | Slightly important | Moderately important | Very important | Extremely important | ✗ No opinion |
|----------------------|--------------------|----------------------|----------------|---------------------|--------------|

■ Q50 If there are bioinformatics competencies you feel are missing in the above, please describe them here.

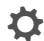

Display This Question:

If Please select the statement below that best describes your current teaching of bioinformatics con... I teach dedicated bioinformatics course(s) to undergraduates majoring in life sciences or closely related disciplines. Is Selected

Or Please select the statement below that best describes your current teaching of bioinformatics con... I teach undergraduates majoring in life sciences or closely related disciplines and include substantial bioinformatics (more than one lecture/lab section) in my teaching. Is Selected

Or Please select the statement below that best describes your current teaching of bioinformatics con... I teach undergraduates majoring in life sciences or closely related disciplines and DO NOT currently include substantial bioinformatics (more than one lecture/lab section) in my teaching but will/would like to do so in the future. Is Selected

■ Q29 At your current institution, do you face any technical barriers in teaching bioinformatics, e.g., availability of a computer lab, different operating systems, access to high performance computing for teaching, IT support?

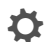

- ☐ Yes  
☐ No

Display This Question:

If At your current institution, do you face any technical barriers in teaching bioinformatics, e.g.,... Yes Is Selected

■ Q30 Optional: Please describe.

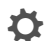

■ Q52 In your opinion, how important is it for undergraduates majoring in life sciences or closely related disciplines to...

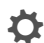

|                                                                                                               | Not at all<br>important | Slightly<br>important | Moderately<br>important | Very<br>important     | Extremely<br>important | × No<br>opinion       |
|---------------------------------------------------------------------------------------------------------------|-------------------------|-----------------------|-------------------------|-----------------------|------------------------|-----------------------|
| Be familiar with the elements of computer programming, e.g., by way of a semester course in computer science? | <input type="radio"/>   | <input type="radio"/> | <input type="radio"/>   | <input type="radio"/> | <input type="radio"/>  | <input type="radio"/> |
| Have a working knowledge of statistics, e.g., by way of a semester course in statistics or biostatistics?     | <input type="radio"/>   | <input type="radio"/> | <input type="radio"/>   | <input type="radio"/> | <input type="radio"/>  | <input type="radio"/> |

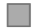

## ABOUT YOU

Q19

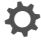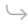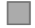

Sex

Q14

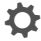

☐ Female

☐ Male

☐ Rather not say

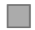

Race

Q15

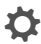

☐ American Indian or Alaska Native

☐ Asian

☐ Black or African American

☐ Native Hawaiian or Other Pacific Islander

☐ White

☐ Rather not say

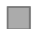

Ethnicity

Q16



☐ Hispanic or Latino

☐ Not Hispanic or Latino

☐ Rather not say

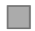

Highest earned degree. If "other," please explain.

Q17

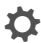

☐ B.S. (or equivalent)

☐ M.S. (or equivalent)

☐ Professional degree (e.g., M.D.)

☐ Ph.D. (or equivalent)

☐ Other, please explain:

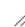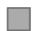

Year of highest earned degree.

Q18

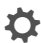

2016

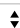

■ Q3

Which of the following best describes your level of bioinformatics training?

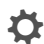

- |                                                        |                                                 |
|--------------------------------------------------------|-------------------------------------------------|
| <input type="radio"/> No training/experience           | <input type="radio"/> Undergraduate degree      |
| <input type="radio"/> No formal training (self-taught) | <input type="radio"/> Post-graduate certificate |
| <input type="radio"/> Short workshop/bootcamp          | <input type="radio"/> Graduate courses          |
| <input type="radio"/> Some undergraduate courses       | <input type="radio"/> Graduate degree           |
| <input type="radio"/> Undergraduate certificate        |                                                 |

Page Break

#### Display This Question:

If Please select the statement below that best describes your current teaching of bioinformatics con... I teach dedicated bioinformatics course(s) to undergraduates majoring in life sciences or closely related disciplines. Is Selected

Or Please select the statement below that best describes your current teaching of bioinformatics con... I teach undergraduates majoring in life sciences or closely related disciplines and include substantial bioinformatics (more than one lecture/lab section) in my teaching. Is Selected

Or Please select the statement below that best describes your current teaching of bioinformatics con... I teach undergraduates majoring in life sciences or closely related disciplines and DO NOT currently include substantial bioinformatics (more than one lecture/lab section) in my teaching but will/would like to do so in the future. Is Selected

Or Please select the statement below that best describes your current teaching of bioinformatics con... I supervise graduate students in the life sciences or closely related disciplines and expect, or would like to expect, graduate student familiarity with bioinformatics. Is Selected

Or To begin the survey, please select the statement that best describes your view of bioinformatics... I do not think bioinformatics should be integrated into undergraduate life sciences education. Is Selected

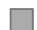

Q20

#### ABOUT YOUR INSTITUTION

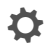

**Display This Question:**

If Please select the statement below that best describes your current teaching of bioinformatics con... I teach dedicated bioinformatics course(s) to undergraduates majoring in life sciences or closely related disciplines. Is Selected

Or Please select the statement below that best describes your current teaching of bioinformatics con... I teach undergraduates majoring in life sciences or closely related disciplines and include substantial bioinformatics (more than one lecture/lab section) in my teaching. Is Selected

Or Please select the statement below that best describes your current teaching of bioinformatics con... I teach undergraduates majoring in life sciences or closely related disciplines and DO NOT currently include substantial bioinformatics (more than one lecture/lab section) in my teaching but will/would like to do so in the future. Is Selected

Or Please select the statement below that best describes your current teaching of bioinformatics con... I supervise graduate students in the life sciences or closely related disciplines and expect, or would like to expect, graduate student familiarity with bioinformatics. Is Selected

Or To begin the survey, please select the statement that best describes your view of bioinformatics... I do not think bioinformatics should be integrated into undergraduate life sciences education. Is Selected

Q21

What is the Carnegie classification of your institution?

- ☐ Associate's College
- ☐ Baccalaureate College
- ☐ Master's (Small, Medium, Large)
- ☐ Doctoral University (High, Higher, Highest Research Activity)
- ☐ Don't know

**Display This Question:**

If Please select the statement below that best describes your current teaching of bioinformatics con... I teach dedicated bioinformatics course(s) to undergraduates majoring in life sciences or closely related disciplines. Is Selected

Or Please select the statement below that best describes your current teaching of bioinformatics con... I teach undergraduates majoring in life sciences or closely related disciplines and include substantial bioinformatics (more than one lecture/lab section) in my teaching. Is Selected

Or Please select the statement below that best describes your current teaching of bioinformatics con... I teach undergraduates majoring in life sciences or closely related disciplines and DO NOT currently include substantial bioinformatics (more than one lecture/lab section) in my teaching but will/would like to do so in the future. Is Selected

Or Please select the statement below that best describes your current teaching of bioinformatics con... I supervise graduate students in the life sciences or closely related disciplines and expect, or would like to expect, graduate student familiarity with bioinformatics. Is Selected

Or To begin the survey, please select the statement that best describes your view of bioinformatics... I do not think bioinformatics should be integrated into undergraduate life sciences education. Is Selected

Q22

Is your institution classified as minority-serving?

- ☐ Yes
- ☐ No
- ☐ Don't know

**Display This Question:**

If Please select the statement below that best describes your current teaching of bioinformatics con... I teach dedicated bioinformatics course(s) to undergraduates majoring in life sciences or closely related disciplines. Is Selected

Or Please select the statement below that best describes your current teaching of bioinformatics con... I teach undergraduates majoring in life sciences or closely related disciplines and include substantial bioinformatics (more than one lecture/lab section) in my teaching. Is Selected

Or Please select the statement below that best describes your current teaching of bioinformatics con... I teach undergraduates majoring in life sciences or closely related disciplines and DO NOT currently include substantial bioinformatics (more than one lecture/lab section) in my teaching but will/would like to do so in the future. Is Selected

Or Please select the statement below that best describes your current teaching of bioinformatics con... I supervise graduate students in the life sciences or closely related disciplines and expect, or would like to expect, graduate student familiarity with bioinformatics. Is Selected

Or To begin the survey, please select the statement that best describes your view of bioinformatics... I do not think bioinformatics should be integrated into undergraduate life sciences education. Is Selected

What is the total number of students (undergraduate and graduate) at your institution?

☐ < 5,000 students

☐ 5,000 - 15,000 students

☐ > 15,000 students

☐ Don't know

**Display This Question:**

If Please select the statement below that best describes your current teaching of bioinformatics con... I teach dedicated bioinformatics course(s) to undergraduates majoring in life sciences or closely related disciplines. Is Selected

Or Please select the statement below that best describes your current teaching of bioinformatics con... I teach undergraduates majoring in life sciences or closely related disciplines and include substantial bioinformatics (more than one lecture/lab section) in my teaching. Is Selected

Or Please select the statement below that best describes your current teaching of bioinformatics con... I teach undergraduates majoring in life sciences or closely related disciplines and DO NOT currently include substantial bioinformatics (more than one lecture/lab section) in my teaching but will/would like to do so in the future. Is Selected

Or Please select the statement below that best describes your current teaching of bioinformatics con... I supervise graduate students in the life sciences or closely related disciplines and expect, or would like to expect, graduate student familiarity with bioinformatics. Is Selected

Or To begin the survey, please select the statement that best describes your view of bioinformatics... I do not think bioinformatics should be integrated into undergraduate life sciences education. Is Selected

What is the total number of undergraduate students at your institution?

☐ < 5,000 students

☐ 5,000 - 15,000 students

☐ > 15,000 students

☐ Don't know

**Display This Question:**

If Please select the statement below that best describes your current teaching of bioinformatics con... I teach dedicated bioinformatics course(s) to undergraduates majoring in life sciences or closely related disciplines. Is Selected

Or Please select the statement below that best describes your current teaching of bioinformatics con... I teach undergraduates majoring in life sciences or closely related disciplines and include substantial bioinformatics (more than one lecture/lab section) in my teaching. Is Selected

Or Please select the statement below that best describes your current teaching of bioinformatics con... I teach undergraduates majoring in life sciences or closely related disciplines and DO NOT currently include substantial bioinformatics (more than one lecture/lab section) in my teaching but will/would like to do so in the future. Is Selected

Or Please select the statement below that best describes your current teaching of bioinformatics con... I supervise graduate students in the life sciences or closely related disciplines and expect, or would like to expect, graduate student familiarity with bioinformatics. Is Selected

Or To begin the survey, please select the statement that best describes your view of bioinformatics... I do not think bioinformatics should be integrated into undergraduate life sciences education. Is Selected

Q25

What is the name of your department/unit (e.g., Department of Biology, Biochemistry Department, School of Interdisciplinary Informatics)?



**Display This Question:**

If Please select the statement below that best describes your current teaching of bioinformatics con... I teach dedicated bioinformatics course(s) to undergraduates majoring in life sciences or closely related disciplines. Is Selected

Or Please select the statement below that best describes your current teaching of bioinformatics con... I teach undergraduates majoring in life sciences or closely related disciplines and include substantial bioinformatics (more than one lecture/lab section) in my teaching. Is Selected

Or Please select the statement below that best describes your current teaching of bioinformatics con... I teach undergraduates majoring in life sciences or closely related disciplines and DO NOT currently include substantial bioinformatics (more than one lecture/lab section) in my teaching but will/would like to do so in the future. Is Selected

Or Please select the statement below that best describes your current teaching of bioinformatics con... I supervise graduate students in the life sciences or closely related disciplines and expect, or would like to expect, graduate student familiarity with bioinformatics. Is Selected

Or To begin the survey, please select the statement that best describes your view of bioinformatics... I do not think bioinformatics should be integrated into undergraduate life sciences education. Is Selected

Q26

How many full-time faculty are in your department/unit? (Do not include part-time faculty or adjuncts.)



- ☐ < 10
- ☐ 10 - 20
- ☐ 21 - 30
- ☐ 31 - 40
- ☐ 41 - 50
- ☐ > 50
- ☐ Don't know



**Display This Question:**

If Please select the statement below that best describes your current teaching of bioinformatics con... I teach dedicated bioinformatics course(s) to undergraduates majoring in life sciences or closely related disciplines. Is Selected

Or Please select the statement below that best describes your current teaching of bioinformatics con... I teach undergraduates majoring in life sciences or closely related disciplines and include substantial bioinformatics (more than one lecture/lab section) in my teaching. Is Selected

Or Please select the statement below that best describes your current teaching of bioinformatics con... I teach undergraduates majoring in life sciences or closely related disciplines and DO NOT currently include substantial bioinformatics (more than one lecture/lab section) in my teaching but will/would like to do so in the future. Is Selected

Or Please select the statement below that best describes your current teaching of bioinformatics con... I supervise graduate students in the life sciences or closely related disciplines and expect, or would like to expect, graduate student familiarity with bioinformatics. Is Selected

Or To begin the survey, please select the statement that best describes your view of bioinformatics... I do not think bioinformatics should be integrated into undergraduate life sciences education. Is Selected

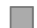

Q27



How many undergraduate students are in your department/unit (all majors)?

- ☐ < 50
- ☐ 51 - 100
- ☐ 101 - 500
- ☐ 501 - 2000
- ☐ > 2000
- ☐ Don't know

Page Break

**Display This Question:**

If Please select the statement below that best describes your current teaching of bioinformatics con... I teach dedicated bioinformatics course(s) to undergraduates majoring in life sciences or closely related disciplines. Is Selected

Or Please select the statement below that best describes your current teaching of bioinformatics con... I teach undergraduates majoring in life sciences or closely related disciplines and include substantial bioinformatics (more than one lecture/lab section) in my teaching. Is Selected

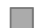

Q28



For each undergraduate course you teach that includes bioinformatics content, please provide the name of the course, the department/unit(s) in which the course is listed, and a brief description of the course.

**Display This Question:**

If Please select the statement below that best describes your current teaching of bioinformatics con... I teach dedicated bioinformatics course(s) to undergraduates majoring in life sciences or closely related disciplines. Is Selected

Or Please select the statement below that best describes your current teaching of bioinformatics con... I teach undergraduates majoring in life sciences or closely related disciplines and include substantial bioinformatics (more than one lecture/lab section) in my teaching. Is Selected

Or Please select the statement below that best describes your current teaching of bioinformatics con... I teach undergraduates majoring in life sciences or closely related disciplines and DO NOT currently include substantial bioinformatics (more than one lecture/lab section) in my teaching but will/would like to do so in the future. Is Selected

Or Please select the statement below that best describes your current teaching of bioinformatics con... I supervise graduate students in the life sciences or closely related disciplines and expect, or would like to expect, graduate student familiarity with bioinformatics. Is Selected

Q33

In your opinion, what do you think are the most important challenges currently facing those educating undergraduate life scientists in bioinformatics?

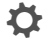

**Display This Question:**

If Please select the statement below that best describes your current teaching of bioinformatics con... I teach dedicated bioinformatics course(s) to undergraduates majoring in life sciences or closely related disciplines. Is Selected

And As part of our work, we are building an online repository of bioinformatics syllabi and content a... No Is Not Selected

Or Please select the statement below that best describes your current teaching of bioinformatics con... I teach undergraduates majoring in life sciences or closely related disciplines and include substantial bioinformatics (more than one lecture/lab section) in my teaching. Is Selected

And As part of our work, we are building an online repository of bioinformatics syllabi and content a... No Is Not Selected

Q39

As part of our work, we are building an online repository of bioinformatics content assessments and syllabi of dedicated bioinformatics courses and life sciences courses with bioinformatics content. Earlier in the survey you indicated a willingness to share your syllabi and/or assessments for this purpose. Please provide those here.



To preserve the confidentiality of your survey response, the survey administrator will disassociate any linked or uploaded files from your survey response before sharing these with the research team for the purpose of the repository.

**ENTER URL LINKS TO ANY CONTENT YOU ARE WILLING TO SHARE HERE:**

#### Display This Question:

If Please select the statement below that best describes your current teaching of bioinformatics con... I teach dedicated bioinformatics course(s) to undergraduates majoring in life sciences or closely related disciplines. Is Selected

And As part of our work, we are building an online repository of bioinformatics syllabi and content a... No Is Not Selected

Or Please select the statement below that best describes your current teaching of bioinformatics con... I teach undergraduates majoring in life sciences or closely related disciplines and include substantial bioinformatics (more than one lecture/lab section) in my teaching. Is Selected

And As part of our work, we are building an online repository of bioinformatics syllabi and content a... No Is Not Selected

Q44

#### UPLOAD COURSE SYLLABI

Please securely upload your relevant course syllabi below. Please note that the system is only able to accept one file upload at a time (max size 16 MB), so if you have multiple syllabi to upload, please combine them prior to upload.

Choose File No file chosen

#### Display This Question:

If Please select the statement below that best describes your current teaching of bioinformatics con... I teach dedicated bioinformatics course(s) to undergraduates majoring in life sciences or closely related disciplines. Is Selected

And As part of our work, we are building an online repository of bioinformatics syllabi and content a... No Is Not Selected

Or Please select the statement below that best describes your current teaching of bioinformatics con... I teach undergraduates majoring in life sciences or closely related disciplines and include substantial bioinformatics (more than one lecture/lab section) in my teaching. Is Selected

And As part of our work, we are building an online repository of bioinformatics syllabi and content a... No Is Not Selected

Q34

#### UPLOAD CONTENT ASSESSMENTS

Please securely upload your relevant content assessments (e.g., quiz and exam questions) below. Please note that the system is only able to accept one file upload (max size 16 MB) at a time, so if you have multiple assessments to upload, please combine them prior to upload.

Choose File No file chosen

#### Display This Question:

If Please select the statement below that best describes your current teaching of bioinformatics con... I supervise graduate students in the life sciences or closely related disciplines and expect, or would like to expect, graduate student familiarity with bioinformatics. Is Selected

Q41

In your opinion, what bioinformatics skill(s) are incoming graduate students most deficient in?

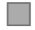

Q35

Additional comments:

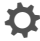

[Add Block](#)

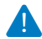

End of Survey

[Survey Termination Options...](#)
